# Supplementary material
Source: PubMed Central journal article supplement (PMC3885484)
Supplement: ijcep0007-0288-f3.pdf [file ijcep0007-0288-f3.pdf]

## β1 integrin expression in colorectal liver metastases

**Supplementary Table 1.** Disease-free and overall survival rate of patients with colorectal liver metastases according to clinicopathologic characteristics of primary and metastatic tumor and Remmele's immunoreactive score of β1-integrin

| Characteristics                                          | Disease-free survival rate (%) |                         |         | Overall survival rate (%) |                         |         |
|----------------------------------------------------------|--------------------------------|-------------------------|---------|---------------------------|-------------------------|---------|
|                                                          | Immunoreactive score           |                         | p-value | Immunoreactive score      |                         | p-value |
|                                                          | positive score<br>(3-12)       | negative score<br>(0-2) |         | positive score<br>(3-12)  | negative score<br>(0-2) |         |
| All                                                      | 41.7 (8.2)                     | 36.4 (7.5)              | 0.605   | 52.3 (9.0)                | 53.8 (7.6)              | 0.501   |
| sex                                                      |                                |                         |         |                           |                         |         |
| male                                                     | 44.4 (11.7)                    | 30.8 (9.4)              | 0.269   | 54.4 (12.1)               | 53.3 (9.9)              | 0.626   |
| female                                                   | 38.9 (11.5)                    | 43.7 (11.9)             | 0.674   | 50.9 (13.3)               | 55.0 (11.9)             | 0.657   |
| age                                                      |                                |                         |         |                           |                         |         |
| ≤60                                                      | 38.9 (11.5)                    | 23.5 (10.3)             | 0.404   | 59.6 (13.3)               | 58.8 (11.9)             | 0.461   |
| >60                                                      | 44.4 (11.7)                    | 45.0 (10.0)             | 0.979   | 46.1 (11.8)               | 50.6 (9.8)              | 0.898   |
| location of primary tumor                                |                                |                         |         |                           |                         |         |
| colon                                                    | 42.1 (11.3)                    | 43.1 (11.1)             | 0.943   | 46.1 (11.9)               | 65.2 (9.9)              | 0.955   |
| rectum                                                   | 41.2 (11.9)                    | 28.6 (9.9)              | 0.398   | 59.4 (13.4)               | 42.9 (10.8)             | 0.367   |
| differentiation of primary tumor                         |                                |                         |         |                           |                         |         |
| well                                                     |                                |                         |         |                           |                         |         |
| moderately                                               | 39.3 (9.2)                     | 35.1 (7.8)              | 0.707   | 49.8 (10.3)               | 54.6 (7.9)              | 0.646   |
| poorly                                                   | 50.0 (17.7)                    | 33.3 (27.2)             | 0.281   | 62.2 (17.8)               | 33.3 (27.2)             | 0.357   |
| unknown                                                  |                                |                         |         |                           |                         |         |
| tumor size of primary tumor                              |                                |                         |         |                           |                         |         |
| T1                                                       | 50.0 (35.4)                    |                         |         | 50.0 (35.4)               |                         |         |
| T2                                                       | 0                              | 27.3 (13.4)             | 0.950   | 66.7 (27.2)               | 36.4 (14.5)             | 0.481   |
| T3                                                       | 48.3 (9.3)                     | 47.4 (9.7)              | 0.970   | 50.8 (10.2)               | 67.1 (9.0)              | 0.724   |
| T4                                                       | 0                              | 0                       | 0.765   | 50.0 (35.4)               | 20.0 (17.9)             | 0.419   |
| lymph node metastasis of primary tumor                   |                                |                         |         |                           |                         |         |
| 0                                                        | 43.8 (12.4)                    | 51.4 (10.6)             | 0.737   | 37.8 (12.5)               | 61.7 (10.1)             | 0.367   |
| 1                                                        | 53.8 (13.8)                    | 22.2 (13.9)             | 0.204   | 76.9 (11.7)               | 53.3 (17.3)             | 0.080   |
| 2                                                        | 14.3 (13.2)                    | 20.0 (12.6)             | 0.834   | 45.7 (22.4)               | 40.0 (14.5)             | 0.810   |
| venous invasion of primary tumor                         |                                |                         |         |                           |                         |         |
| absent                                                   | 41.7 (10.1)                    | 41.3 (8.9)              | 0.777   | 54.4 (11.2)               | 51.9 (9.0)              | 0.476   |
| present                                                  | 33.3 (27.2)                    | 28.6 (17.1)             | 0.822   | 50.0 (35.4)               | 71.4 (17.1)             | 0.675   |
| lymphatic invasion of primary tumor                      |                                |                         |         |                           |                         |         |
| absent                                                   | 37.5 (17.1)                    | 52.9 (12.1)             | 0.727   | 17.8 (15.6)               | 68.6 (11.7)             | 0.081   |
| present                                                  | 42.1 (11.3)                    | 26.5 (9.9)              | 0.335   | 72.4 (10.5)               | 45.5 (10.6)             | 0.033   |
| stage                                                    |                                |                         |         |                           |                         |         |
| I                                                        | 25.0 (21.7)                    | 16.7 (15.2)             | 0.347   | 50.0 (25.0)               | 33.3 (19.2)             | 0.840   |
| II                                                       | 45.5 (15.0)                    | 70.0 (14.5)             | 0.307   | 25.0 (14.4)               | 62.3 (15.0)             | 0.220   |
| III                                                      | 31.3 (11.6)                    | 21.4 (11.0)             | 0.945   | 61.7 (14.6)               | 50.0 (13.4)             | 0.413   |
| IV                                                       | 80.0 (17.9)                    | 36.9 (13.8)             | 0.112   | 80.0 (17.9)               | 59.3 (14.3)             | 0.198   |
| differentiation of liver metastases                      |                                |                         |         |                           |                         |         |
| well                                                     |                                |                         |         |                           |                         |         |
| moderately                                               | 41.4 (9.1)                     | 39.6 (7.8)              | 0.835   | 53.1 (10.4)               | 55.4 (7.9)              | 0.539   |
| poorly                                                   | 50.0 (20.4)                    | 0                       | 0.267   | 57.1 (18.7)               | 50.0 (35.4)             | 0.249   |
| unknown                                                  |                                |                         |         |                           |                         |         |
| time interval between primary tumor and liver metastasis |                                |                         |         |                           |                         |         |
| synchron                                                 | 80.0 (17.9)                    | 36.9 (13.8)             | 0.112   | 80.0 (17.9)               | 59.3 (14.3)             | 0.198   |
| metachron                                                | 35.5 (8.6)                     | 35.9 (8.9)              | 0.859   | 46.5 (10.1)               | 51.1 (9.1)              | 0.854   |
